# Supplementary material
Source: Springer Nature journal article supplement (https://www.springermedizin.de/resource/supplementary/13069_2012_124_MOESM5_ESM.pdf/9659870)

## Nude DF wound healing after CsA treatment

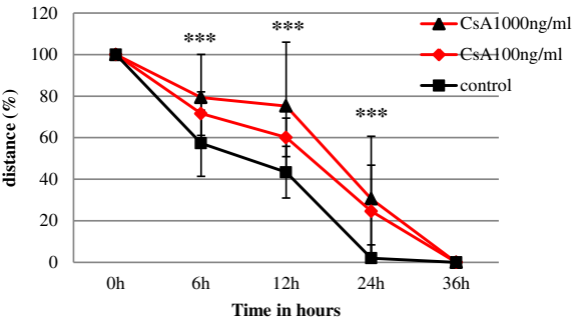

## B6 DF wound healing after CsA treatment

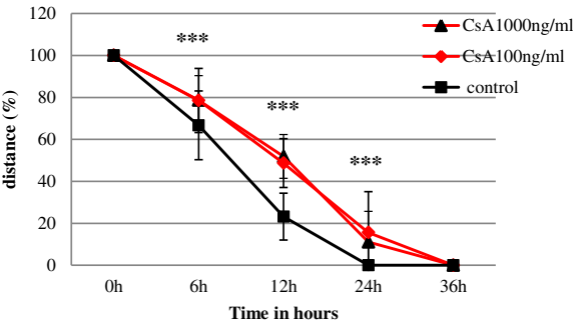

Supplement: MOESM5 [file 9659870]
